# Supplementary material
Source: MDPI journal article supplement (https://www.mdpi.com/2076-0825/10/5/102)
Supplement: s1 [file s1]

Article

# A Sensorized Soft Pneumatic Actuator Fabricated with Extrusion-Based Additive Manufacturing

Antonia Georgopoulou <sup>1,2,\*</sup>, Lukas Egloff <sup>1</sup>, Bram Vanderborght <sup>2</sup> and Frank Clemens <sup>1,\*</sup>

<sup>1</sup> Department of Functional Materials, Empa—Swiss Federal Laboratories for Materials Science and Technology, Überlandstrasse 129, 8600 Dübendorf, Switzerland; lukas.egloff@math.ethz.ch

<sup>2</sup> Brubotics, Vrije Universiteit Brussel (VUB) and Imec, Pleinlaan 2, B-1050 Brussels, Belgium; Bram.Vanderborght@vub.be

\* Correspondence: antonia.georgopoulou@empa.ch (A.G.); frank.clemens@empa.ch (F.C.)

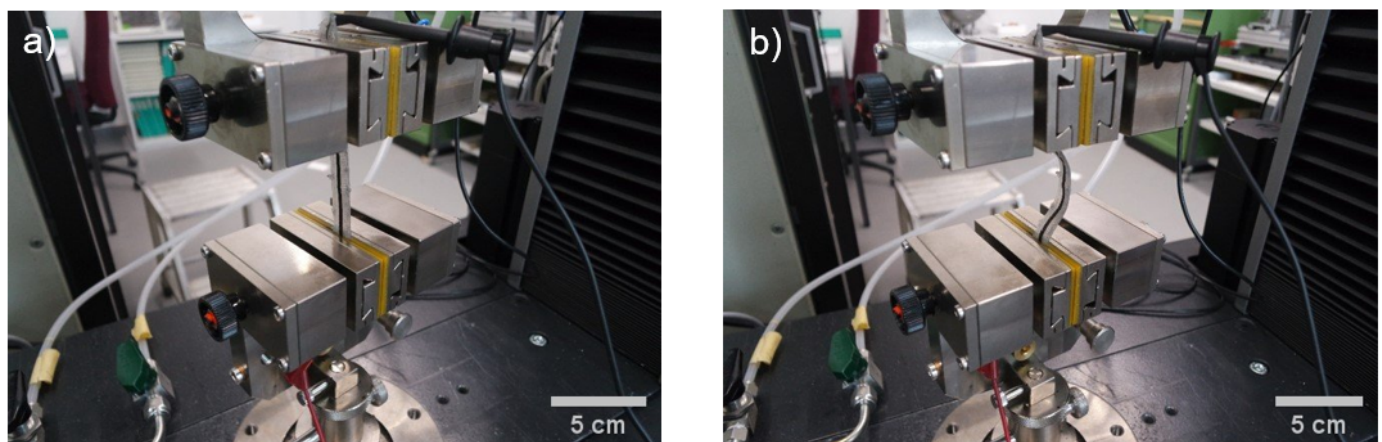

**Supplementary Figure S1.** The strip with the integrated sensing element (a) before and (b) after the dynamic tensile testing. The length did not return to the original value after the test and this phenomenon is described as buckling.
