# Supplementary material
Source: MDPI journal article supplement (https://www.mdpi.com/2076-0825/10/5/102)
Supplement: s1 [file s1]

Archive with 1 entries (1 files):
- actuators-1184806-supplementary.pdf
